# Supplementary material for: Small Interfering RNA Targeted to IGF-IR Delays Tumor Growth and Induces Proinflammatory Cytokines in a Mouse Breast Cancer Model
Source: PubMed Central journal article supplement (PMC3250415; doi:10.1371/journal.pone.0029213), 2012-01-03
Supplement: pone.0029213.s002.pdf [file pone.0029213.s002.pdf]

|         |                                                                          | Pos  | Name      | Id   |
|---------|--------------------------------------------------------------------------|------|-----------|------|
| mIGF-IR | ATGAAGTCTGGCTCCGGAGGAGGGTCCCCGACCTCGC---TGTGGGGGCTCGTGTTC                | 57   | KSG       | 0.42 |
| mINS-R  | ATGGGCTTCGGGAGAGGATGTGAGACGACGGCTGTGCCATTGCTGGTGGCCGTGGCCCG              | 60   |           |      |
|         | *** * ** * * * * * * * * * * * * * * * * * * * * * * * * * * * * * * *   |      |           |      |
| mIGF-IR | //ATCCGCAACGACTATCAGCAGCTGAAGCGCCTGGAAAACGCACGGTGATCGAGGGCTTC            | 174  | DYQ       | 0.37 |
| mINS-R  | //ATCCGGAACAACCTGACCAGGTACATGAGCTGGAGAACTGCTCAGTCATGAGGGCCAT             | 177  |           |      |
|         | ***** ** * * * * * * * * * * * * * * * * * * * * * * * * * * * * * * *   |      |           |      |
| mIGF-IR | //CTGGTCATCTTCGAGATGACCAATCTCAAGGATATTGGGGCTTTATAATCTGAGGAACATT          | 408  | MTN/LKD   |      |
| mINS-R  | //CTGGTTATCTTCGAGATGGTCCACCTGAAGGAGCTGGGGCTTTATAACCTCATGAACATC           | 417  | 0.68/0.73 |      |
|         | ***** ***** * * * * * * * * * * * * * * * * * * * * * * * * * * * *      |      |           |      |
| mIGF-IR | //TGGTCTCTCATCTTGGATGCGGTGTCCAATAACTACATTGTGGGGAACAA-GCCCCCGA-           | 526  | LDA       | 0.69 |
| mINS-R  | //TGGTCCCCTATCCTGGATTCTGTGGAGGACAACACTACATTGTAAGTGAACAAAGATGACAAC        | 537  |           |      |
|         | ***** * ** * * * * * * * * * * * * * * * * * * * * * * * * * * * * * * * |      |           |      |
| mIGF-IR | //ACCATCAACAATGAGTACAACCTACCCTGCTGGACCACAAATCGCTGCCAGAAAATGTGC           | 645  | NNE       | 0.31 |
| mINS-R  | //GTCATCAATGGGCAGTTTGTGGAACGGTGTGGACACACAGTCATGTGAGAAAGTTTGC             | 657  |           |      |
|         | ***** * * * * * * * * * * * * * * * * * * * * * * * * * * * * * * *      |      |           |      |
| mIGF-IR | //CGCCAGAGCAAAGGGACATAAACACCAGGAACAACGGAGAGCGAGCTTCCTGTGAAAGT            | 1473 | DIN       | 0.58 |
| mINS-R  | //CGTCAGGAGAGGAACGACATTGCCCTGAAGACCAATGGGGACCAGGCATCGTGTGAAAT            | 1491 |           |      |
|         | ** * * * * * * * * * * * * * * * * * * * * * * * * * * * * * * * * *     |      |           |      |
| mIGF-IR | //CCAACACGACCATGTCCAGCCGAAGCAGGAACACCACGGTAGCTGACACCTACAATATCA           | 2299 | ADT       | 0.52 |
| mINS-R  | //GGAATGTGACAG---CCACCACACTCACACTTCCAGATTTCCCAACGCTCTCCTTACCA            | 2383 |           |      |
|         | ** * * * * * * * * * * * * * * * * * * * * * * * * * * * * * * * * *     |      |           |      |
| mIGF-IR | //CAGAGACCTTGCTGCTAGGAAGTGCATGGTAGCCGAAGATTTCACAGTCAAAATTGGAGA           | 3464 | CMV       | 0.84 |
| mINS-R  | //CCGGGACCTGGCAGCTCGAACTGCATGGTTGCCCATGATTTACTGTCAAATTTGGAGA             | 3500 |           |      |
|         | * * * * * * * * * * * * * * * * * * * * * * * * * * * * * * * * * *      |      |           |      |

**Figure S1. Alignment of mouse IGF-IR and INS-R mRNAs.**

Clustal 2.0.12 multiple alignments of mIGF-IR (Genbank NM\_010513) and mouse insulin receptor (Genbank NM\_010568) were performed using the EMBL-EBI web site. Start positions refer to the translation initiation codons. For clarity, only regions with siRNA binding sites are shown and these binding sites are highlighted in gray. The LKD siRNA sequence is underlined. There is a global similarity of 0.62 between mIGF-IR and mINS-R: similarity in siRNA sites are indicated in percentages (Id).
