# Supplementary material for: Small Interfering RNA Targeted to IGF-IR Delays Tumor Growth and Induces Proinflammatory Cytokines in a Mouse Breast Cancer Model
Source: PubMed Central journal article supplement (PMC3250415; doi:10.1371/journal.pone.0029213), 2012-01-03
Supplement: pone.0029213.s003.pdf [file pone.0029213.s003.pdf]

Table S1. siRNA sequences.

| Name        | Target <sup>1</sup> | Position <sup>2</sup> | Size (bp) | Strand  | Sequence <sup>3</sup>                                                            | References <sup>4</sup> |
|-------------|---------------------|-----------------------|-----------|---------|----------------------------------------------------------------------------------|-------------------------|
| KSG         | IGF-IR (M+H+R)      | 3                     | 21        | S<br>AS | 5'-GAAGUCUGGCUCGGAGGAdTdT-3'<br>3'-dTdTTCUUCAGACCGAGGCCUCCU-5'                   | -                       |
| DYQ         | IGF-IR (M+H+R)      | 123                   | 21        | S<br>AS | 5'-CGACUAUCAGCAGCUGAAGdTdT-3'<br>3'-dTdTGCUGAUAGUCGUCGACUUC-5'                   | [ 1 ]                   |
| MTN         | IGF-IR (M+H+R)      | 351                   | 21        | S<br>AS | 5'-GAUGACCAUUCUCAAGGAuTdTdT-3'<br>3'-dTdTTCUACUGGUUAGAGUCCUA-5'                  | [ 2 ]                   |
| LKD         | IGF-IR (M+H+R)      | 363                   | 21        | S<br>AS | 5'-UCUCAAGGAUAUUGGGCUuTdTdT-3'<br>3'-dTdTAGAGUCCUAUAACCCGAA-5'                   | [ 3 ]                   |
| LDA         | IGF-IR (M+H+R)      | 482                   | 25        | S<br>AS | 5'-UGGAUGCGGUGUCCAUAUACuTdTdT-3'<br>3'-dTdTACCUACGCCACAGGUUAUUGAUG-5'            | [ 4 ]                   |
| NNE         | IGF-IR (M+H+R)      | 594                   | 21        | S<br>AS | 5'-CAAUGAGUACAACUACCGCdTdT-3'<br>3'-dTdTGUUACUCAUGUUGAUGGCG-5'                   | [ 5 ]                   |
| DIN         | IGF-IR (M+H+R)      | 1429                  | 21        | S<br>AS | 5'-GACAUAAACACCAGGAACdTdT-3'<br>3'-dTdTTCUGUAUUUGGUCUUGU-5'                      | [ 2 ]                   |
| ADT         | IGF-IR (M+R)        | 2281                  | 21        | S<br>AS | 5'-GCUGACACCUACAUAUACdTdT-3'<br>3'-dTdTTCGACUGGUGAUGUUAUAGU-5'                   | [ 6 ]                   |
| CMV         | IGF-IR (M)          | 3426                  | 21        | S<br>AS | 5'-CUGCAUGGUAGCCGAGAAdTdT-3'<br>3'-dTdTTCAGUACCAUCGGCUUCUA-5'                    | [ 7 ]                   |
| 2'Ome ADT   | IGF-IR (M+R)        | 2281                  | 21        | S<br>AS | 5'-GC <u>u</u> GACACCUACAUA <u>u</u> ACdTdT-3'<br>3'-dTdTTCGACUGGUGAUGUUAUAGU-5' | -                       |
| CONT1       | none                | -                     | 21        | S<br>AS | 5'-GUCACACCGAUAAGUCACdTdT-3'<br>3'-dTdTTCAGUUGGCUAUUCAGUGU-5'                    | [ 8 ]                   |
| CONT2       | none                | -                     | 21        | S<br>AS | 5'-UUCUCGAACGUGUCAGUdTdT-3'<br>3'-dTdTAAAGGGCUUGCACAGUGCA-5'                     | [ 5 ]                   |
| 2'Ome CONT1 | none                | -                     | 21        | S<br>AS | 5'-G <u>u</u> CACACCGAUAAG <u>u</u> CACdTdT-3'<br>3'-dTdTTCAGUUGGCUAUUCAGUGU-5'  | -                       |
| 2'Ome CONT2 | none                | -                     | 21        | S<br>AS | 5'-UUCUCGAACG <u>u</u> G <u>u</u> CACGdTdT-3'<br>3'-dTdTAAAGGGCUUGCACAGUGCA-5'   | -                       |
| hRluc       | Renilla luciferase  | 105                   | 21        | S<br>AS | 5'-CUACUAUGAUCCGAGAAdTdT-3'<br>3'-dTdTGAUGUAUCAAGGCCUUC-5'                       | -                       |

<sup>1</sup>siRNA are targeted to IGF-IR in three species, M, mouse; R, rat; H, human. <sup>2</sup>Positions on the target gene were indicated from the mature protein, without signal peptide. <sup>3</sup>Underlined bold u indicates 2'-O-methyluridine residue. <sup>4</sup>References 1. Niu, J, Xu, Z, Li, X-N, Han, Z. (2007) siRNA-mediated type 1 insulin-like growth factor receptor silencing induces chemosensitization of a human liver cancer cell line with mutant P53. *Cell Biology International* 31: 156-164. 2. Chalk, AM, Wahlestedt, C, Sonnhammer, ELL. (2004) Improved and automated prediction of effective siRNA. *Biochem Biophys Res Commun* 319: 264-274. 3. Da Silva Xavier, G, Qian, Q, Cullen, PJ, Rutter, GA. (2004) Distinct roles for insulin and insulin-like growth factor-1 receptors in pancreatic beta-cell glucose sensing revealed by RNA silencing. *Biochem J* 377: 149-158. 4. Naito, Y, Yamada, T, Ui-Tei, K, Morishita, S, Saigo, K. (2004) siDirect: highly effective, target-specific siRNA design software for mammalian RNA interference. *Nucleic Acids Res* 32: W124-W129. 5. Yeh, AH, Bohula, EA, Macaulay, VM. (2006) Human melanoma cells expressing V600E B-RAF are susceptible to IGF1R targeting by small interfering RNAs. *Oncogene* 25: 6574-6581. 6. Rosengren, L, Vasilcanu, D, Vasilcanu, R, Fickenscher, S, Sehat, B, et al. (2006) IGF-1R tyrosine kinase expression and dependency in clones of IGF-1R knockout cells (R-). *Biochem Biophys Res Commun* 347: 1059-1066. 7. Carboni, JM, Lee, AV, Hadsell, DL, Rowley, BR, Lee, FY, et al. (2005) Tumor development by transgenic expression of a constitutively active insulin-like growth factor I receptor. *Cancer Research* 65: 3781-3787. 8. Rochester, MA, Riedemann, J, Hellawell, GO, Brewster, SF, Macaulay, VM. (2005) Silencing of the IGF1R gene enhances sensitivity to DNA-damaging agents in both PTEN wild-type and mutant human prostate cancer. *Cancer Gene Ther* 12: 90-100. MTN, LDA and DIN siRNAs were designed using online software described in reference 2 and 4.
