# Supplementary material for: Small Interfering RNA Targeted to IGF-IR Delays Tumor Growth and Induces Proinflammatory Cytokines in a Mouse Breast Cancer Model
Source: PubMed Central journal article supplement (PMC3250415; doi:10.1371/journal.pone.0029213), 2012-01-03
Supplement: pone.0029213.s005.pdf [file pone.0029213.s005.pdf]

Table S3. Characteristics of tumors obtained from mice injected with C4HD cells transfected with 2'-O-methyl siRNAs.

| <b>Mouse group<sup>1</sup></b> | <b>Mitotic Index<sup>2</sup></b> | <b>Necrosis (%)</b> | <b>Fibrosis (%)</b> | <b>Infiltration</b>              |
|--------------------------------|----------------------------------|---------------------|---------------------|----------------------------------|
| Untreated                      | GM3                              | 20-40               | 10                  | None                             |
| CONT2                          | GM3                              | 40-60               | 20                  | None                             |
| ADT                            | GM1                              | 40                  | 30                  | Lymphocytes and PMN <sup>3</sup> |

<sup>1</sup>Number of mitotic bodies per high power field (HPF). <sup>2</sup>GM1-2 indicates 0-5 mitosis per 10 HPF; GM3 indicates > 10 mitoses per 10 HPF. <sup>3</sup>Polymorphonuclear neutrophils.
